# Supplementary material for: Engaging DBFO as a C1N1 “two-atom synthon” in [3 + 2] cycloaddition reaction: synthesis of the energetic material 5-azidotetrazolate 1N-oxide
Source: Royal Society of Chemistry journal article supplement (doi:10.1039/d1qo00123j), 2021-01-01

# Engaging DBFO as a C1N1 “Two-Atom Synthon” in [3+2] Cycloaddition Reaction: Synthesis of energetic materials 5-Azidotetrazole 1*N*-Oxide

Yong Hu,<sup>a</sup> Xiao-Jun Wang,<sup>a</sup> Wen-Shuai Dong,<sup>a</sup> Yu-Fan Bi,<sup>a</sup> Zu-Jia Lu,<sup>a</sup> Wen-Li Cao,<sup>a</sup> Jian-Guo Zhang,<sup>\*a</sup> Qi Zhang,<sup>b</sup> and Dong Chen<sup>b</sup>

[a] Y. Hu, Prof. J.-G. Zhang, W.-S. Dong, Y.-F. Bi, W.-L. Cao  
State Key Laboratory of Explosion Science and Technology, Beijing Institute of Technology  
Beijing 100081 P. R. China  
E-mail: zjgbit@bit.edu.cn

[b] Prof. Q. Zhang, D. Chen  
Institute of Chemical Materials, China Academy of Engineering Physics  
Mianyang, Sichuan 621900, China

## Table of Contents

|                                                                              |    |
|------------------------------------------------------------------------------|----|
| 1 Crystallographic Data for <b>2</b> , <b>5–9</b> .....                      | 2  |
| 2 NMR spectra <sup>1</sup> H or <sup>13</sup> C NMR Spectra of product ..... | 8  |
| 3 DSC spectra of <b>5–9</b> .....                                            | 14 |
| 4. Calculated rate constant k for <b>3</b> to <b>4</b> .....                 | 17 |

# 1 Crystallographic Data for 2, 5–9

Table S1 Crystal data and structure refinement details of 2, 5–9

| Compound Name                     | 2                                                 | 5•3H <sub>2</sub> O                               | 6•3H <sub>2</sub> O                               | 7•H <sub>2</sub> O                                | 8                                                 | 9                                                 |
|-----------------------------------|---------------------------------------------------|---------------------------------------------------|---------------------------------------------------|---------------------------------------------------|---------------------------------------------------|---------------------------------------------------|
| Empirical formula                 | CH <sub>4</sub> BrN <sub>5</sub> O                | CH <sub>6</sub> LiN <sub>7</sub> O <sub>4</sub>   | CH <sub>6</sub> N <sub>7</sub> NaO <sub>4</sub>   | CH <sub>2</sub> KN <sub>7</sub> O <sub>2</sub>    | CH <sub>4</sub> N <sub>8</sub> O                  | C <sub>2</sub> H <sub>6</sub> N <sub>10</sub> O   |
| Formula weight                    | 182.00                                            | 187.07                                            | 203.12                                            | 183.2                                             | 144.12                                            | 186.17                                            |
| Temperature [K]                   | 298(2)                                            | 298(2)                                            | 296(2)                                            | 298(2)                                            | 298(2)                                            | 298(2)                                            |
| Crystal system                    | orthorhombic                                      | monoclinic                                        | triclinic                                         | triclinic                                         | monoclinic                                        | monoclinic                                        |
| Space group                       | <i>Pbca</i>                                       | <i>P2<sub>1</sub>/n</i>                           | <i>P-1</i>                                        | <i>P1</i>                                         | <i>P2<sub>1</sub>/c</i>                           | <i>C2/c</i>                                       |
| A [Å]                             | 13.6300(12)                                       | 10.8794(11)                                       | 6.5213(10)                                        | 4.1780(5)                                         | 8.1819(8)                                         | 11.6030(11)                                       |
| B [Å]                             | 7.5726(7)                                         | 6.6298(7)                                         | 6.6446(10)                                        | 5.2749(6)                                         | 31.960(3)                                         | 7.7399(7)                                         |
| C [Å]                             | 21.2621(19)                                       | 12.4870(13)                                       | 10.3328(16)                                       | 8.0471(8)                                         | 7.6696(7)                                         | 17.4853(15)                                       |
| α [°]                             | 90.00                                             | 90.00                                             | 97.055(2)                                         | 97.332(3)                                         | 90                                                | 90.00                                             |
| β [°]                             | 90.00                                             | 111.646(5)                                        | 104.341(2)                                        | 91.810(2)                                         | 117.412(5)                                        | 101.915(3)                                        |
| γ [°]                             | 90.00                                             | 90.00                                             | 107.556(2)                                        | 91.691(2)                                         | 90                                                | 90.00                                             |
| V [Å <sup>3</sup> ]               | 2194.6(3)                                         | 837.15(15)                                        | 404.01(11)                                        | 175.71(3)                                         | 1780.4(3)                                         | 1536.5(2)                                         |
| Z                                 | 16                                                | 4                                                 | 2                                                 | 1                                                 | 12                                                | 8                                                 |
| ρ [g•cm <sup>-3</sup> ]           | 2.203                                             | 1.484                                             | 1.67                                              | 1.731                                             | 1.613                                             | 1.610                                             |
| F(000)                            | 1408.0                                            | 384.0                                             | 208                                               | 92                                                | 888                                               | 768.0                                             |
| Crystal size [mm <sup>3</sup> ]   | 0.40 × 0.11 × 0.05                                | 0.20 × 0.13 × 0.10                                | 0.12 × 0.10 × 0.08                                | 0.40 × 0.30 × 0.16                                | 0.49 × 0.32 × 0.11                                | 0.47 × 0.35 × 0.30                                |
| Θ [°]                             | 4.86 to 50.04                                     | 4.26 to 50.04                                     | 4.166 to 54.79                                    | 5.1 to 50                                         | 5.1 to 50.04                                      | 4.76 to 50.02                                     |
| Index ranges                      | -16 ≤ h ≤ 16, -8 ≤ k ≤ 9, -25 ≤ l ≤ 9             | -12 ≤ h ≤ 11, -7 ≤ k ≤ 7, -14 ≤ l ≤ 12            | -8 ≤ h ≤ 8, -8 ≤ k ≤ 8, -7 ≤ l ≤ 13               | -4 ≤ h ≤ 4, -6 ≤ k ≤ 6, -8 ≤ l ≤ 9                | -7 ≤ h ≤ 9, -31 ≤ k ≤ 38, -9 ≤ l ≤ 9              | -13 ≤ h ≤ 13, -7 ≤ k ≤ 9, -20 ≤ l ≤ 20            |
| Reflections collected             | 9136                                              | 4055                                              | 2483                                              | 870                                               | 8850                                              | 3712                                              |
| Independent reflections           | 1915                                              | 1467                                              | 1778                                              | 733                                               | 3108                                              | 1352                                              |
| Goodness-of-fit on F <sup>2</sup> | 1.006                                             | 1.084                                             | 0.988                                             | 1.12                                              | 1.076                                             | 1.054                                             |
| Final R indexes [I ≥ 2σ (I)]      | R <sub>1</sub> = 0.0793, wR <sub>2</sub> = 0.2274 | R <sub>1</sub> = 0.0636, wR <sub>2</sub> = 0.1340 | R <sub>1</sub> = 0.0358, wR <sub>2</sub> = 0.1125 | R <sub>1</sub> = 0.0577, wR <sub>2</sub> = 0.1571 | R <sub>1</sub> = 0.0796, wR <sub>2</sub> = 0.1903 | R <sub>1</sub> = 0.0523, wR <sub>2</sub> = 0.1263 |
| Final R indexes [all data]        | R <sub>1</sub> = 0.1114, wR <sub>2</sub> = 0.2504 | R <sub>1</sub> = 0.1037, wR <sub>2</sub> = 0.1487 | R <sub>1</sub> = 0.0379, wR <sub>2</sub> = 0.1144 | R <sub>1</sub> = 0.0582, wR <sub>2</sub> = 0.1582 | R <sub>1</sub> = 0.1100, wR <sub>2</sub> = 0.2066 | R <sub>1</sub> = 0.0685, wR <sub>2</sub> = 0.1330 |
| CCDC No.                          | 2057903                                           | 2044151                                           | 2044152                                           | 2044153                                           | 2044154                                           | 2044155                                           |

**Table S2 Selected bond lengths of 5·3H<sub>2</sub>O**

| bond   | Length[Å] | bond  | Length[Å] |
|--------|-----------|-------|-----------|
| Li1-O2 | 1.897(6)  | N2-N3 | 1.320(3)  |
| Li1-O4 | 1.963(6)  | N3-N4 | 1.355(3)  |
| Li1-O1 | 1.964(6)  | N4-C1 | 1.330(4)  |
| Li1-O3 | 1.971(6)  | N5-N6 | 1.259(4)  |
| N1-C1  | 1.338(3)  | N5-C1 | 1.386(4)  |
| N1-O1  | 1.342(3)  | N6-N7 | 1.112(3)  |
| N1-N2  | 1.343(3)  |       |           |

**Table S3 Selected angles of 5·3H<sub>2</sub>O**

| bond      | Angle [°] | bond      | Angle [°] |
|-----------|-----------|-----------|-----------|
| O2-Li1-O4 | 118.4(3)  | N3-N2-N1  | 106.2(2)  |
| O2-Li1-O1 | 108.7(3)  | N2-N3-N4  | 110.7(2)  |
| O4-Li1-O1 | 109.2(3)  | C1-N4-N3  | 105.4(2)  |
| O2-Li1-O3 | 111.7(3)  | N6-N5-C1  | 112.2(2)  |
| O4-Li1-O3 | 98.9(2)   | N7-N6-N5  | 172.4(3)  |
| O1-Li1-O3 | 109.4(3)  | N1-O1-Li1 | 122.5(2)  |
| C1-N1-O1  | 129.2(2)  | N4-C1-N1  | 109.2(2)  |
| C1-N1-N2  | 108.5(2)  | N4-C1-N5  | 129.9(3)  |
| O1-N1-N2  | 122.3(2)  | N1-C1-N5  | 120.9(2)  |

**Table S4 Hydrogen bonds present in 5·3H<sub>2</sub>O**

| D-H...A      | d(D-H) [Å] | d(H...A) [Å] | <DHA [°] | d(D..A) [Å] |                       |
|--------------|------------|--------------|----------|-------------|-----------------------|
| O2-H2A...N4  | 0.850      | 2.05         | 172.93   | 2.896       | -x+2, -y+1, -z        |
| O2-H2B...O3  | 0.850      | 1.982        | 176.22   | 2.83        | -x+1, -y+1, -z        |
| O3-H3A...O1  | 0.850      | 1.932        | 175.86   | 2.781       | -x+3/2, y+1/2, -z+1/2 |
| O3-H3B...N2  | 0.850      | 2.064        | 170.77   | 2.906       | -x+3/2, y-1/2, -z+1/2 |
| O4-H4A...O1  | 0.850      | 1.96         | 178.06   | 2.809       | -x+3/2, y-1/2, -z+1/2 |
| O4-H4Cb...N7 | 0.850      | 2.355        | 155.3    | 3.147       | -x+2, -y, -z          |

**Table S5 Selected bond lengths of 6·3H<sub>2</sub>O**

| bond                | Length[Å]  | bond                 | Length[Å]  |
|---------------------|------------|----------------------|------------|
| N1–C3               | 1.324(2)   | Na1–Na1 <sup>2</sup> | 3.6222(13) |
| N1–N2               | 1.357(2)   | N2–N3                | 1.304(2)   |
| Na1–O4              | 2.3579(14) | C3–N4                | 1.3334(19) |
| Na1–O5              | 2.3950(14) | C3–N5                | 1.388(2)   |
| Na1–O3              | 2.4133(14) | N3–N4                | 1.3440(19) |
| Na1–O4 <sup>1</sup> | 2.4288(14) | N4–O1                | 1.3280(17) |
| Na1–O3 <sup>2</sup> | 2.4302(14) | N5–N6                | 1.2490(19) |
| Na1–N7              | 2.7388(18) | N6–N7                | 1.119(2)   |
| Na1–Na11            | 3.5390(14) |                      |            |

<sup>1</sup>1-X, 2-Y, 2-Z; <sup>2</sup>1-X, 1-Y, 2-Z**Table S6 Selected angles of 6·3H<sub>2</sub>O**

| bond                                  | Angle [°]  | bond                                   | Angle [°]  |
|---------------------------------------|------------|----------------------------------------|------------|
| C3–N1–N2                              | 105.49(13) | N7–Na1–Na1 <sup>1</sup>                | 124.24(5)  |
| O4–Na1–O5                             | 97.10(5)   | O4–Na1–Na1 <sup>2</sup>                | 110.58(4)  |
| O4–Na1–O3                             | 99.81(5)   | O5–Na1–Na1 <sup>2</sup>                | 126.09(4)  |
| O5–Na1–O3                             | 162.34(5)  | O3–Na1–Na1 <sup>2</sup>                | 41.77(3)   |
| O4–Na1–O4 <sup>1</sup>                | 84.66(5)   | O4 <sup>1</sup> –Na1–Na1 <sup>2</sup>  | 135.27(5)  |
| O5–Na1–O4 <sup>1</sup>                | 91.09(5)   | O3 <sup>2</sup> –Na1–Na1 <sup>2</sup>  | 41.42(3)   |
| O3–Na1–O4 <sup>1</sup>                | 95.51(5)   | N7–Na1–Na1 <sup>2</sup>                | 75.62(4)   |
| O4–Na1–O3 <sup>2</sup>                | 110.78(5)  | Na1 <sup>1</sup> –Na1–Na1 <sup>2</sup> | 136.20(4)  |
| O5–Na1–O3 <sup>2</sup>                | 86.09(5)   | N3–N2–N1                               | 110.38(13) |
| O3–Na1–O3 <sup>2</sup>                | 83.19(5)   | N1–C3–N4                               | 109.26(13) |
| O4 <sup>1</sup> –Na1–O3 <sup>2</sup>  | 164.52(5)  | N1–C3–N5                               | 129.51(14) |
| O4–Na1–N7                             | 166.61(6)  | N4–C3–N5                               | 121.23(14) |
| O5–Na1–N7                             | 87.94(5)   | Na1–O3–Na1 <sup>2</sup>                | 96.81(5)   |
| O3–Na1–N7                             | 76.70(5)   | N2–N3–N4                               | 106.88(13) |
| O4 <sup>1</sup> –Na1–N7               | 82.84(5)   | O1–N4–C3                               | 129.04(13) |
| O3 <sup>2</sup> –Na1–N7               | 81.85(5)   | O1–N4–N3                               | 122.95(12) |
| O4–Na1–Na1 <sup>1</sup>               | 43.10(3)   | C3–N4–N3                               | 107.98(13) |
| O5–Na1–Na1 <sup>1</sup>               | 95.48(4)   | Na1–O4–Na1 <sup>1</sup>                | 95.34(5)   |
| O3–Na1–Na1 <sup>1</sup>               | 100.33(4)  | N6–N5–C3                               | 112.44(13) |
| O4 <sup>1</sup> –Na1–Na1 <sup>1</sup> | 41.56(3)   | N7–N6–N5                               | 172.76(17) |
| O3 <sup>2</sup> –Na1–Na1 <sup>1</sup> | 153.87(5)  | N6–N7–Na1                              | 156.59(16) |

<sup>1</sup>1-X, 2-Y, 2-Z; <sup>2</sup>1-X, 1-Y, 2-Z**Table S7 Hydrogen bonds present in 6·3H<sub>2</sub>O**

| D–H•••A     | d(D-H) [Å] | d(H•••A) [Å] | <DHA [°] | d(D..A) [Å] |                  |
|-------------|------------|--------------|----------|-------------|------------------|
| O2–H2A•••O1 | 0.850      | 1.946        | 166.68   | 2.780       | -x, -y, -z       |
| O2–H2B•••O4 | 0.850      | 2.059        | 169.87   | 2.899       | -x, -y+1, -z+1   |
| O3–H3A•••N4 | 0.850      | 2.129        | 152.65   | 2.910       | -x+1, -y+1, -z+1 |
| O3–H3B•••O1 | 0.850      | 1.943        | 169.92   | 2.784       | x, y+1, z+1      |
| O3–H3B•••N1 | 0.850      | 2.563        | 140.41   | 3.263       | x, y+1, z+1      |
| O4–H4C•••O1 | 0.850      | 1.945        | 166.34   | 2.778       | -x, -y+1, -z     |
| O4–H4D•••N2 | 0.850      | 2.132        | 172.81   | 2.977       | -x, -y, -z       |

**Table S8 Selected bond lengths of 7·H<sub>2</sub>O**

| bond               | Length[Å] | bond               | Length[Å] |
|--------------------|-----------|--------------------|-----------|
| K1–O1              | 2.754(5)  | N1–N2              | 1.375(8)  |
| K1–O2 <sup>1</sup> | 2.764(6)  | N1–K1 <sup>1</sup> | 3.372(5)  |
| K1–O2              | 2.766(6)  | N2–N3              | 1.316(8)  |
| K1–O1 <sup>2</sup> | 2.793(6)  | N2–K1 <sup>5</sup> | 2.893(6)  |
| K1–N2 <sup>3</sup> | 2.893(6)  | N3–N4              | 1.346(10) |
| K1–N7 <sup>4</sup> | 3.075(8)  | N4–C1              | 1.341(9)  |
| K1–N5              | 3.190(6)  | N5–N6              | 1.273(9)  |
| K1–N1 <sup>2</sup> | 3.372(6)  | N5–C1              | 1.408(9)  |
| K1–K1 <sup>2</sup> | 4.1780(5) | N6–N7              | 1.114(11) |
| K1–K1 <sup>1</sup> | 4.1780(5) | N7–K1 <sup>6</sup> | 3.075(8)  |
| N1–O1              | 1.325(7)  | O1–K1 <sup>1</sup> | 2.793(6)  |
| N1–C1              | 1.345(9)  | O2–K1 <sup>2</sup> | 2.764(6)  |

<sup>1</sup>1+X, +Y, +Z; <sup>2</sup>-1+X, +Y, +Z; <sup>3</sup>-1+X, 1+Y, +Z; <sup>4</sup>+X, +Y, 1+Z; <sup>5</sup>1+X, -1+Y, +Z; <sup>6</sup>+X, +Y, -1+Z

**Table S9 Selected angles of 7·H<sub>2</sub>O**

| bond                                | Angle [°]  | bond                                | Angle [°]  |
|-------------------------------------|------------|-------------------------------------|------------|
| O1–K1–O2 <sup>1</sup>               | 78.86(15)  | N5–K1–K1 <sup>2</sup>               | 107.56(12) |
| O1–K1–O2                            | 159.82(17) | N1 <sup>2</sup> –K1–K1 <sup>2</sup> | 56.33(10)  |
| O2 <sup>1</sup> –K1–O2              | 98.14(15)  | O1–K1–K1 <sup>1</sup>               | 41.48(11)  |
| O1–K1–O1 <sup>2</sup>               | 97.74(15)  | O2 <sup>1</sup> –K1–K1 <sup>1</sup> | 40.95(11)  |
| O2 <sup>1</sup> –K1–O1 <sup>2</sup> | 159.97(17) | O2–K1–K1 <sup>1</sup>               | 139.09(11) |
| O2–K1–O1 <sup>2</sup>               | 78.17(14)  | O1 <sup>2</sup> –K1–K1 <sup>1</sup> | 139.22(11) |
| O1–K1–N2 <sup>3</sup>               | 129.46(15) | N2 <sup>3</sup> –K1–K1 <sup>1</sup> | 114.30(11) |
| O2 <sup>1</sup> –K1–N2 <sup>3</sup> | 106.87(18) | N7 <sup>4</sup> –K1–K1 <sup>1</sup> | 87.24(19)  |
| O2–K1–N2 <sup>3</sup>               | 70.63(16)  | N5–K1–K1 <sup>1</sup>               | 72.44(12)  |
| O1 <sup>2</sup> –K1–N2 <sup>3</sup> | 90.63(16)  | N1 <sup>2</sup> –K1–K1 <sup>1</sup> | 123.67(10) |
| O1–K1–N7 <sup>4</sup>               | 81.6(2)    | K1 <sup>2</sup> –K1–K1 <sup>1</sup> | 180.00(4)  |
| O2 <sup>1</sup> –K1–N7 <sup>4</sup> | 74.1(2)    | O1–N1–C1                            | 129.4(6)   |
| O2–K1–N7 <sup>4</sup>               | 78.4(2)    | O1–N1–N2                            | 123.0(6)   |
| O1 <sup>2</sup> –K1–N7 <sup>4</sup> | 85.9(2)    | C1–N1–N2                            | 107.7(5)   |
| N2 <sup>3</sup> –K1–N7 <sup>4</sup> | 148.9(2)   | O1–N1–K1 <sup>1</sup>               | 53.4(3)    |
| O1–K1–N5                            | 57.74(17)  | C1–N1–K1 <sup>1</sup>               | 114.9(4)   |
| O2 <sup>1</sup> –K1–N5              | 108.25(15) | N2–N1–K1 <sup>1</sup>               | 105.2(4)   |
| O2–K1–N5                            | 140.24(17) | N3–N2–N1                            | 106.0(6)   |
| O1 <sup>2</sup> –K1–N5              | 85.70(14)  | N3–N2–K1 <sup>5</sup>               | 120.7(4)   |
| N2 <sup>3</sup> –K1–N5              | 73.50(15)  | N1–N2–K1 <sup>5</sup>               | 132.6(4)   |
| N7 <sup>4</sup> –K1–N5              | 136.8(2)   | N2–N3–N4                            | 111.3(5)   |
| O1–K1–N1 <sup>2</sup>               | 84.46(15)  | C1–N4–N3                            | 106.0(6)   |
| O2 <sup>1</sup> –K1–N1 <sup>2</sup> | 163.21(17) | N6–N5–C1                            | 111.6(5)   |
| O2–K1–N1 <sup>2</sup>               | 96.85(16)  | N6–N5–K1                            | 139.3(5)   |
| O1 <sup>2</sup> –K1–N1 <sup>2</sup> | 22.40(13)  | C1–N5–K1                            | 108.9(4)   |
| N2 <sup>3</sup> –K1–N1 <sup>2</sup> | 85.24(15)  | N7–N6–N5                            | 172.3(8)   |
| N7 <sup>4</sup> –K1–N1 <sup>2</sup> | 101.7(2)   | N6–N7–K1 <sup>6</sup>               | 166.3(8)   |
| N5–K1–N1 <sup>2</sup>               | 63.32(14)  | N1–O1–K1                            | 122.0(4)   |
| O1–K1–K1 <sup>2</sup>               | 138.52(11) | N1–O1–K1 <sup>1</sup>               | 104.2(4)   |
| O2 <sup>1</sup> –K1–K1 <sup>2</sup> | 139.05(11) | K1–O1–K1 <sup>1</sup>               | 97.74(15)  |
| O2–K1–K1 <sup>2</sup>               | 40.91(11)  | K1 <sup>2</sup> –O2–K1              | 98.14(15)  |
| O1 <sup>2</sup> –K1–K1 <sup>2</sup> | 40.78(11)  | N4–C1–N1                            | 109.0(6)   |

|                                     |           |          |          |
|-------------------------------------|-----------|----------|----------|
| N2 <sup>3</sup> -K1-K1 <sup>2</sup> | 65.70(11) | N4-C1-N5 | 131.0(6) |
| N7 <sup>4</sup> -K1-K1 <sup>2</sup> | 92.76(19) | N1-C1-N5 | 120.0(6) |

<sup>1</sup>1+X, +Y, +Z; <sup>2</sup>-1+X, +Y, +Z; <sup>3</sup>-1+X, 1+Y, +Z; <sup>4</sup>+X, +Y, 1+Z; <sup>5</sup>1+X, -1+Y, +Z; <sup>6</sup>+X, +Y, -1+Z

**Table S10 Hydrogen bonds present in 7·H<sub>2</sub>O**

| D-H...A     | d(D-H) [Å] | d(H...A) [Å] | <DHA [°] | d(D..A) [Å] |               |
|-------------|------------|--------------|----------|-------------|---------------|
| O2-H2A...O1 | 0.850      | 2.069        | 141.85   | 2.788       | x-1, y+1, z   |
| O2-H2B...N4 | 0.850      | 2.138        | 159.53   | 2.949       | x-1, y+1, z+1 |

**Table S11 Selected bond lengths of 8**

| bond    | Length[Å] | bond      | Length[Å] |
|---------|-----------|-----------|-----------|
| N1-C1   | 1.320(5)  | N13-N14   | 1.102(6)  |
| N1-O1   | 1.322(4)  | N15-O3    | 1.243(7)  |
| N1-N2   | 1.327(5)  | N15-C3    | 1.368(6)  |
| N2-N3   | 1.291(5)  | N15-N16   | 1.371(6)  |
| N3-N4   | 1.339(5)  | N16-N17   | 1.369(6)  |
| N4-C1   | 1.315(5)  | N17-N18   | 1.392(6)  |
| N5-N6   | 1.232(5)  | N18-C3    | 1.402(6)  |
| N5-C1   | 1.374(5)  | N15'-O3   | 1.296(19) |
| N6-N7   | 1.119(6)  | N15'-C3'  | 1.407(9)  |
| N8-O2   | 1.310(4)  | N15'-N16' | 1.417(9)  |
| N8-C2   | 1.322(5)  | N16'-N17' | 1.422(9)  |
| N8-N9   | 1.330(5)  | N17'-N18' | 1.429(9)  |
| N9-N10  | 1.294(5)  | N18'-C3'  | 1.398(9)  |
| N10-N11 | 1.347(6)  | N19-C3'   | 1.166(11) |
| N11-C2  | 1.315(6)  | N19-N20   | 1.221(6)  |
| N12-N13 | 1.245(6)  | N19-C3    | 1.368(6)  |
| N12-C2  | 1.350(6)  | N20-N21   | 1.105(6)  |

**Table S12 Selected angles of 8**

| bond        | Angle [°] | bond           | Angle [°] |
|-------------|-----------|----------------|-----------|
| C1-N1-O1    | 128.4(3)  | O3'-N15'-C3'   | 133.6(17) |
| C1-N1-N2    | 108.5(3)  | O3'-N15'-N16'  | 118.9(17) |
| O1-N1-N2    | 123.1(3)  | C3'-N15'-N16'  | 106.9(6)  |
| N3-N2-N1    | 106.5(3)  | N15'-N16'-N17' | 107.8(6)  |
| N2-N3-N4    | 110.7(3)  | N16'-N17'-N18' | 108.4(6)  |
| C1-N4-N3    | 105.6(3)  | C3'-N18'-N17'  | 106.1(6)  |
| N6-N5-C1    | 112.9(3)  | C3'-N19-N20    | 133.4(9)  |
| N7-N6-N5    | 172.5(5)  | C3'-N19-C3     | 24.2(7)   |
| O2-N8-C2    | 128.4(3)  | N20-N19-C3     | 109.8(4)  |
| O2-N8-N9    | 122.7(3)  | N21-N20-N19    | 171.4(5)  |
| C2-N8-N9    | 109.0(3)  | N4-C1-N1       | 108.7(3)  |
| N10-N9-N8   | 106.0(4)  | N4-C1-N5       | 131.5(4)  |
| N9-N10-N11  | 111.0(4)  | N1-C1-N5       | 119.8(3)  |
| C2-N11-N10  | 105.4(4)  | N11-C2-N8      | 108.7(4)  |
| N13-N12-C2  | 118.8(4)  | N11-C2-N12     | 122.3(4)  |
| N14-N13-N12 | 170.1(5)  | N8-C2-N12      | 129.0(4)  |
| O3-N15-C3   | 130.0(5)  | N19-C3-N15     | 121.5(5)  |

|             |          |               |           |
|-------------|----------|---------------|-----------|
| O3–N15–N16  | 121.7(5) | N19–C3–N18    | 129.8(4)  |
| C3–N15–N16  | 108.2(4) | N15–C3–N18    | 108.6(4)  |
| N17–N16–N15 | 108.4(4) | N19–C3'–N18'  | 134.3(13) |
| N16–N17–N18 | 108.8(4) | N19–C3'–N15'  | 114.8(13) |
| N17–N18–C3  | 106.0(4) | N18'–C3'–N15' | 110.7(6)  |

**Table S13 Selected bond lengths of 9**

| bond  | Angle [°] | bond   | Angle [°] |
|-------|-----------|--------|-----------|
| N1–O1 | 1.308(2)  | N5–N6  | 1.236(3)  |
| N1–C1 | 1.314(3)  | N5–C1  | 1.367(3)  |
| N1–N2 | 1.329(3)  | N6–N7  | 1.108(3)  |
| N2–N3 | 1.285(3)  | N8–C2  | 1.295(3)  |
| N3–N4 | 1.332(3)  | N9–C2  | 1.301(3)  |
| N4–C1 | 1.300(3)  | N10–C2 | 1.298(3)  |

**Table S14 Selected angles of 9**

| bond     | Angle [°]  | bond      | Angle [°] |
|----------|------------|-----------|-----------|
| O1–N1–C1 | 130.4(2)   | N7–N6–N5  | 172.2(3)  |
| O1–N1–N2 | 121.71(19) | N4–C1–N1  | 109.0(2)  |
| C1–N1–N2 | 107.9(2)   | N4–C1–N5  | 129.9(2)  |
| N3–N2–N1 | 106.8(2)   | N1–C1–N5  | 121.1(2)  |
| N2–N3–N4 | 110.1(2)   | N8–C2–N10 | 121.0(2)  |
| C1–N4–N3 | 106.2(2)   | N8–C2–N9  | 120.2(2)  |
| N6–N5–C1 | 112.7(2)   | N10–C2–N9 | 118.7(2)  |
| O1–N1–C1 | 130.4(2)   | N7–N6–N5  | 172.2(3)  |

**Table S15 Hydrogen bonds present in 9**

| D–H•••A       | d(D–H) [Å] | d(H•••A) [Å] | < DHA [°] | d(D..A) [Å] |                       |
|---------------|------------|--------------|-----------|-------------|-----------------------|
| N8–H8A•••O1   | 0.86       | 2.000        | 168.88    | 2.848       | x-1/2, y+1/2, z       |
| N8–H8B•••N2   | 0.86       | 2.235        | 149.72    | 3.009       | x, y+1, z             |
| N9–H9A•••O1   | 0.86       | 2.256        | 147.33    | 3.016       | x, y+1, z             |
| N9–H9B•••O1   | 0.86       | 2.153        | 139.36    | 2.861       | -x+1, y+1, -z+3/2     |
| N10–H10A•••O1 | 0.86       | 2.213        | 139.71    | 2.922       | -x+1/2, y+1/2, -z+3/2 |
| N10–H10B•••N4 | 0.86       | 2.052        | 173.82    | 2.908       | x, -y+1, z+1/2        |

## 2 NMR spectra $^1\text{H}$ or $^{13}\text{C}$ NMR Spectra of product

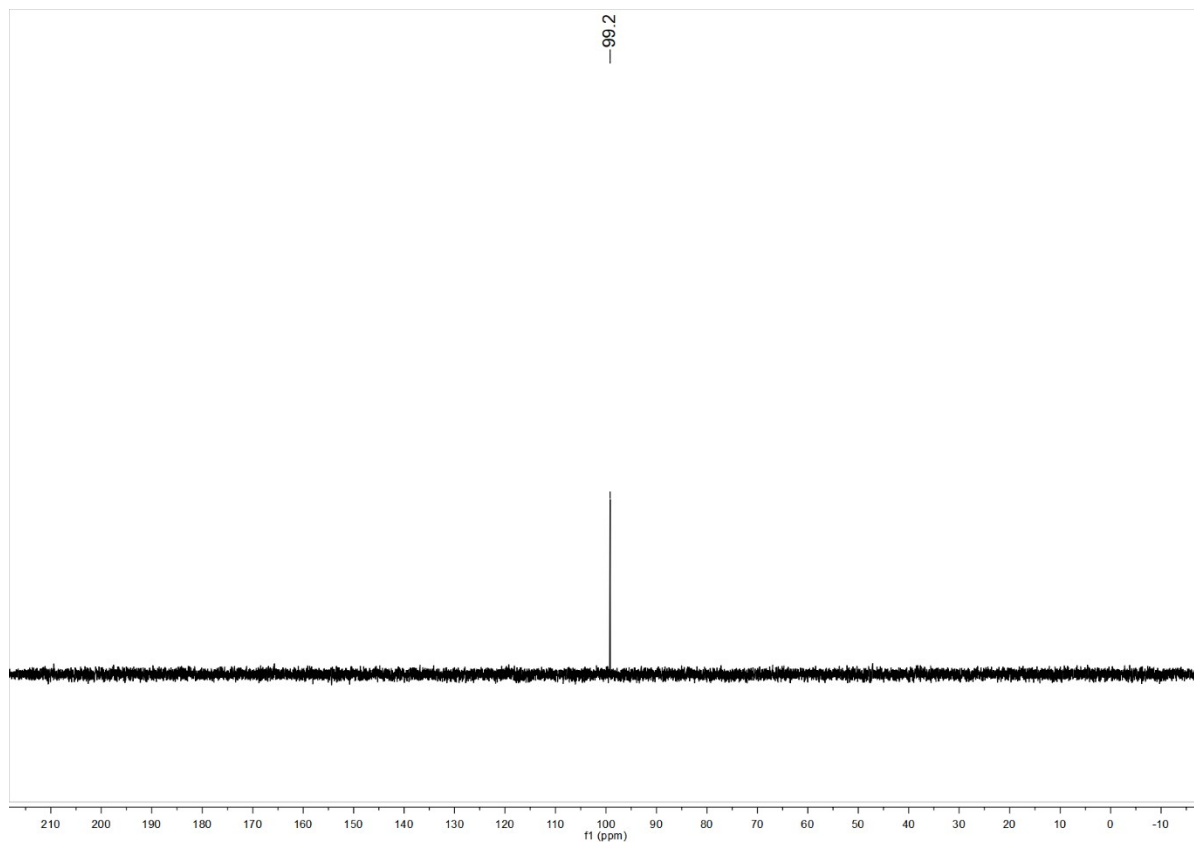

$^{13}\text{C}$  NMR of **DBFO** in  $\text{D}_2\text{O}$  at 25 °C

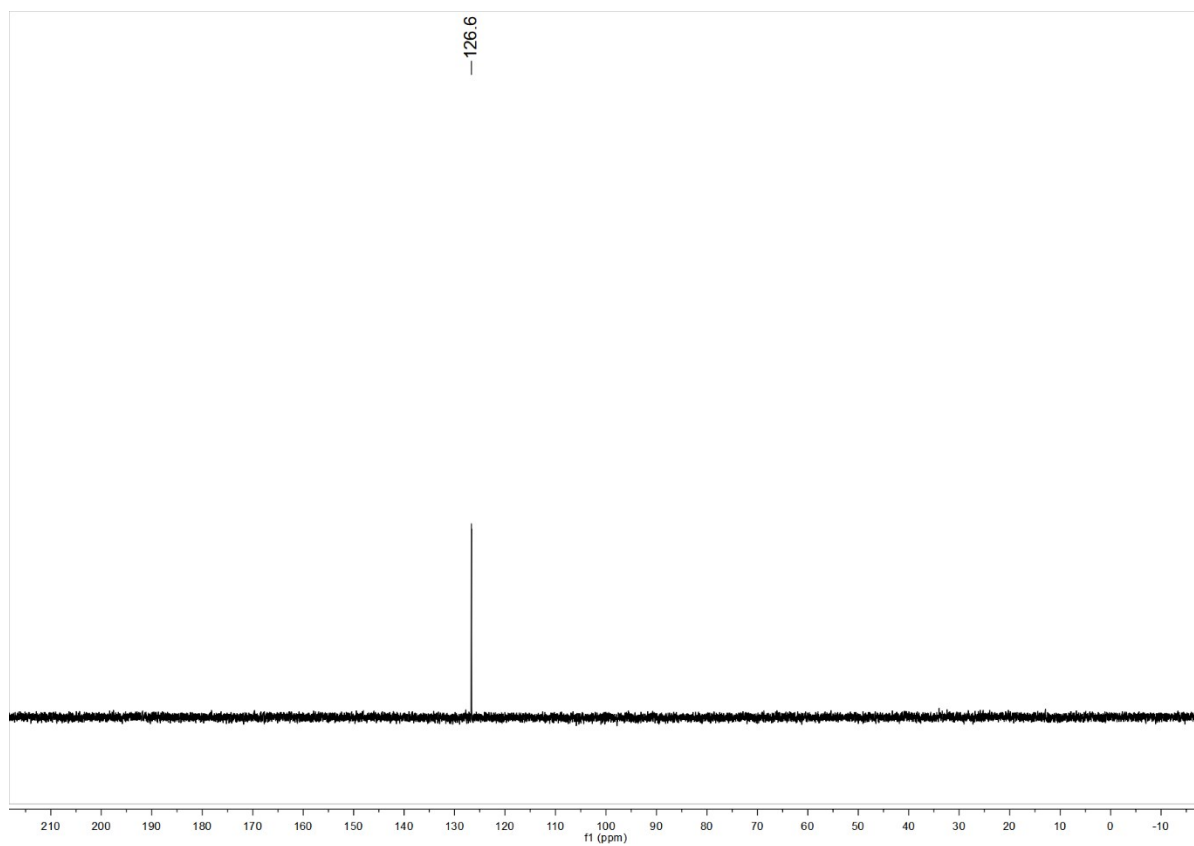

$^{13}\text{C}$  NMR of intermediate **I** in  $\text{D}_2\text{O}$  at 25 °C



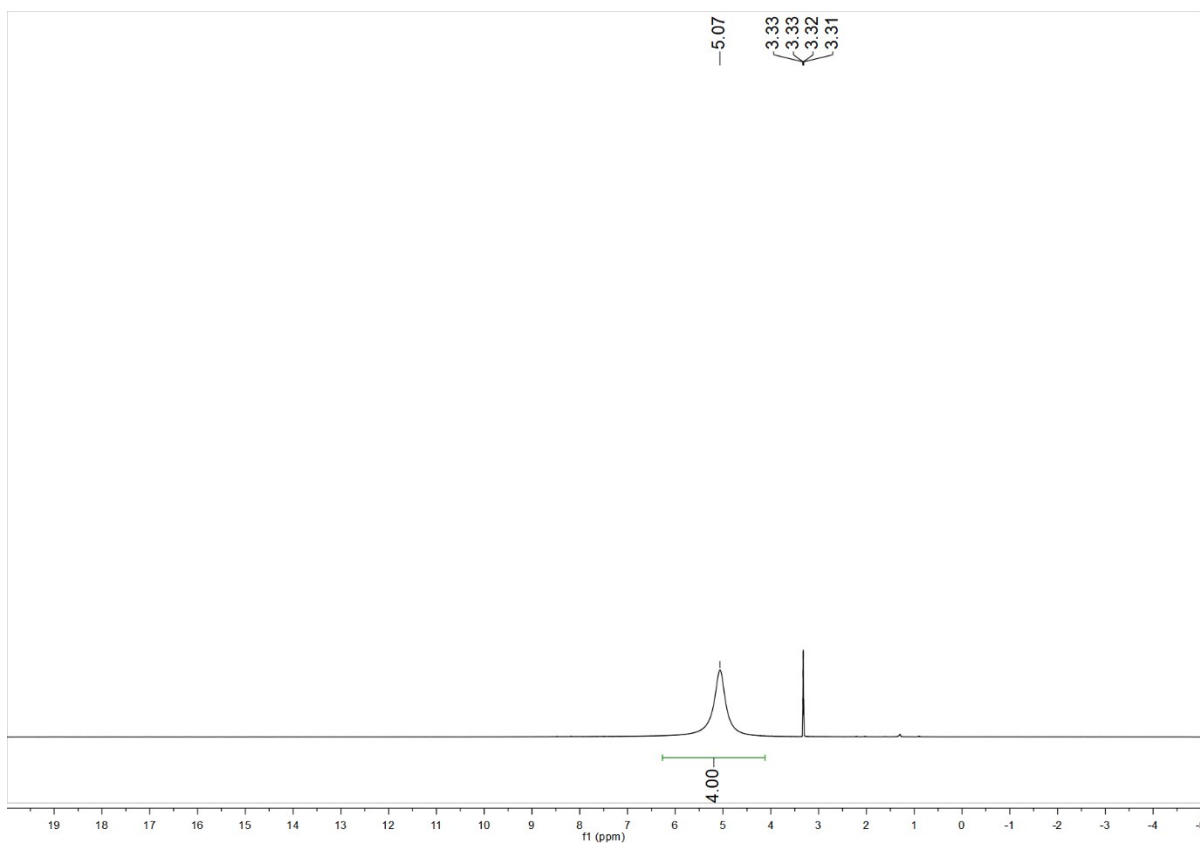

<sup>1</sup>H NMR of 2 in Methanol-*d*<sub>4</sub> at 25 °C

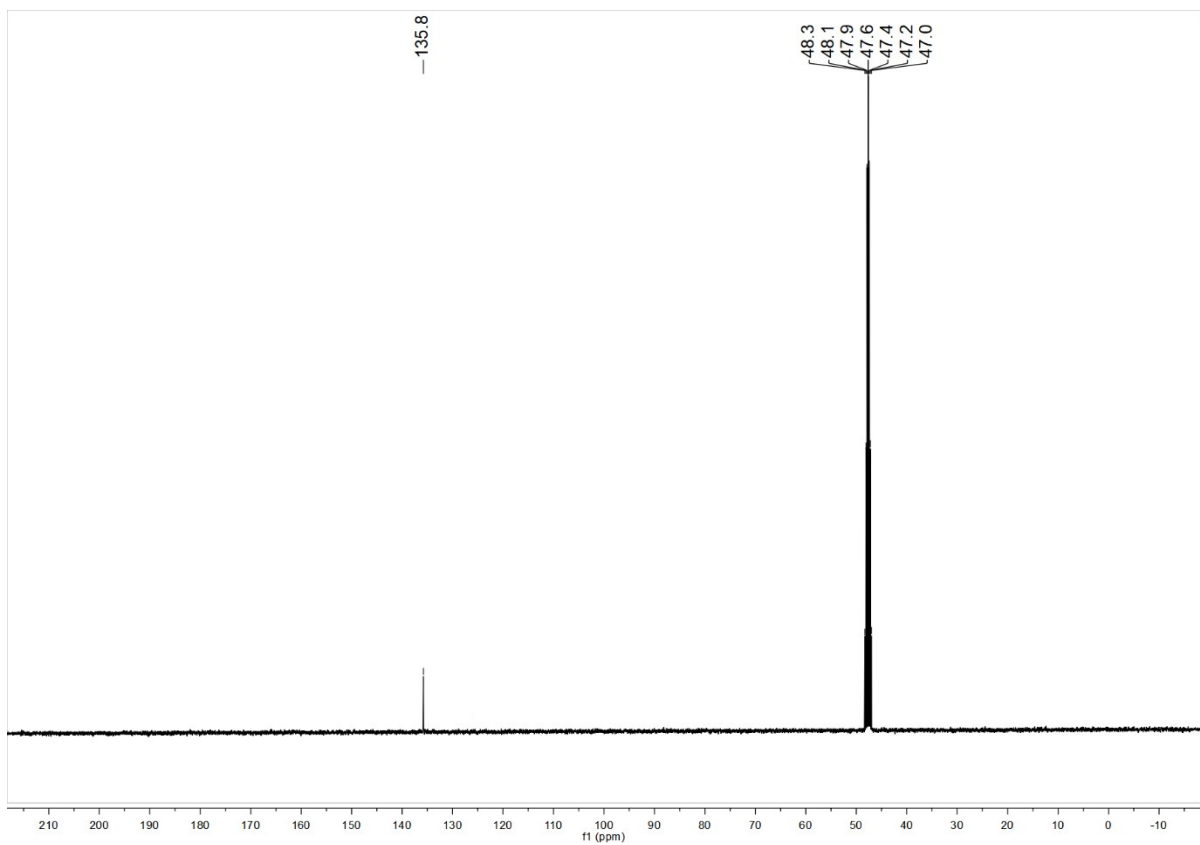

<sup>13</sup>C NMR of 2 in Methanol-*d*<sub>4</sub> at 25 °C

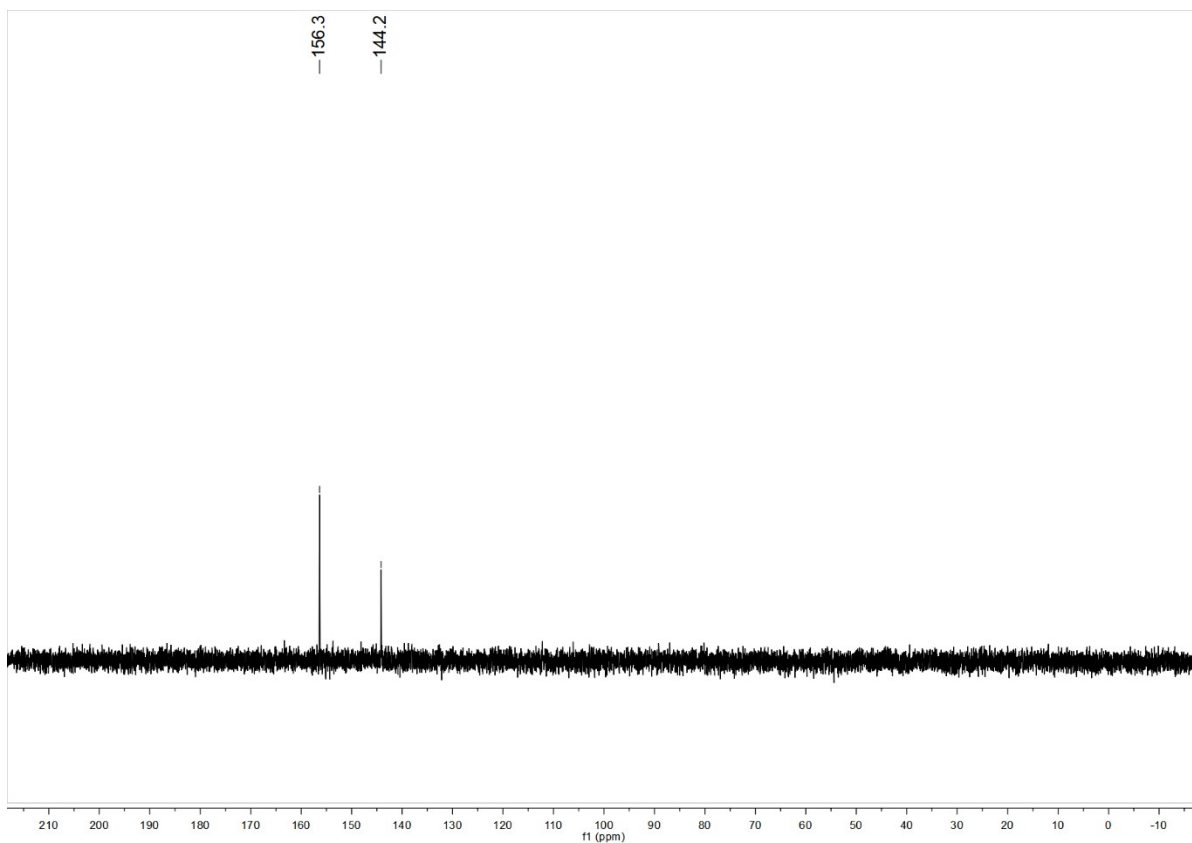

$^{13}\text{C}$  NMR of **4** in  $\text{D}_2\text{O}$  at 25 °C

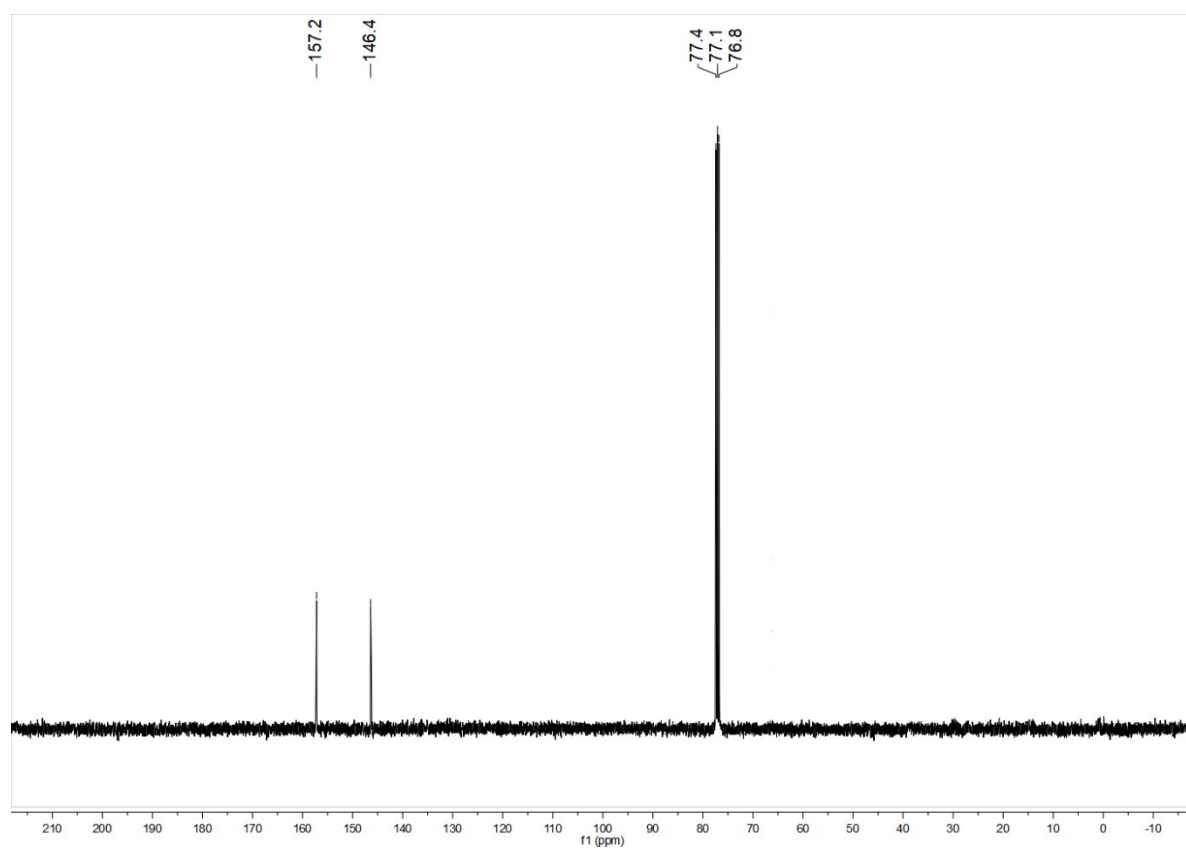

$^{13}\text{C}$  NMR of **4** in  $\text{CDCl}_3$  at 25 °C

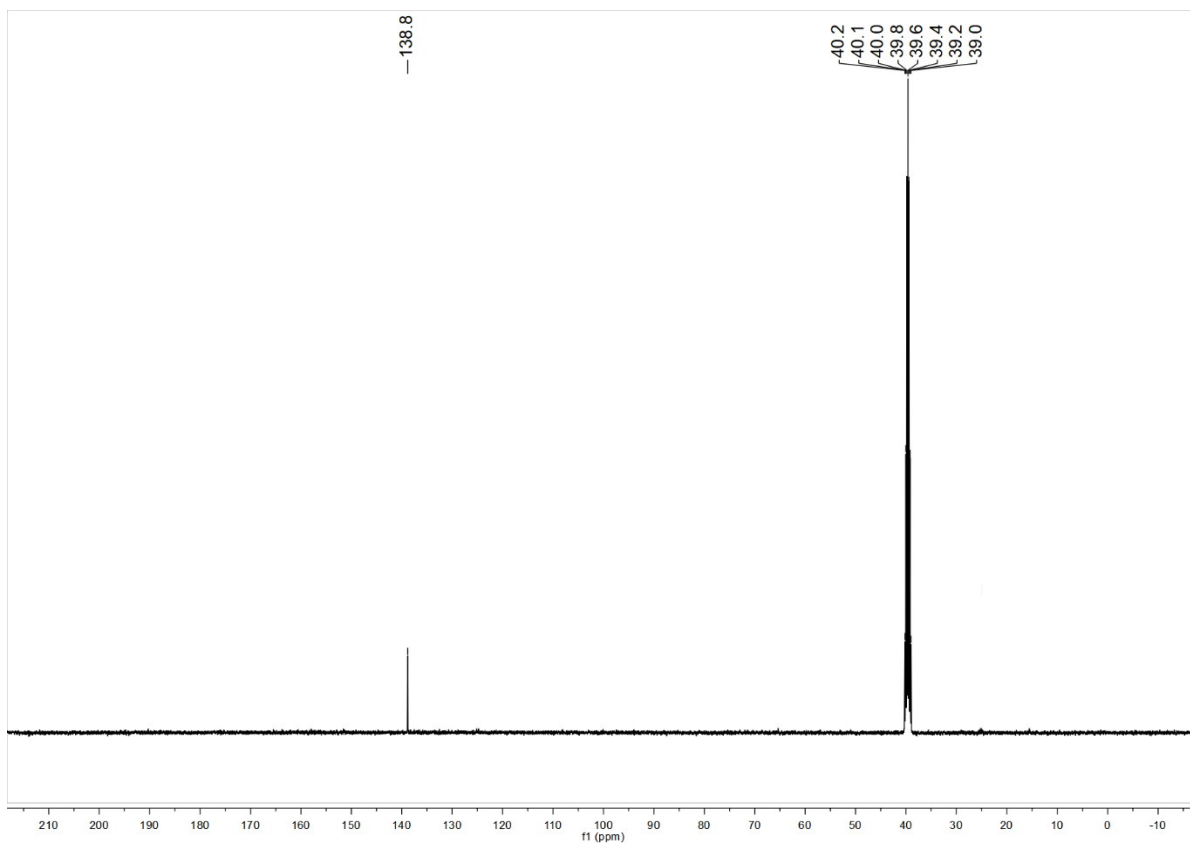

$^{13}\text{C}$  NMR of  $5 \cdot 3\text{H}_2\text{O}$  in  $\text{DMSO-}d_6$  at 25 °C

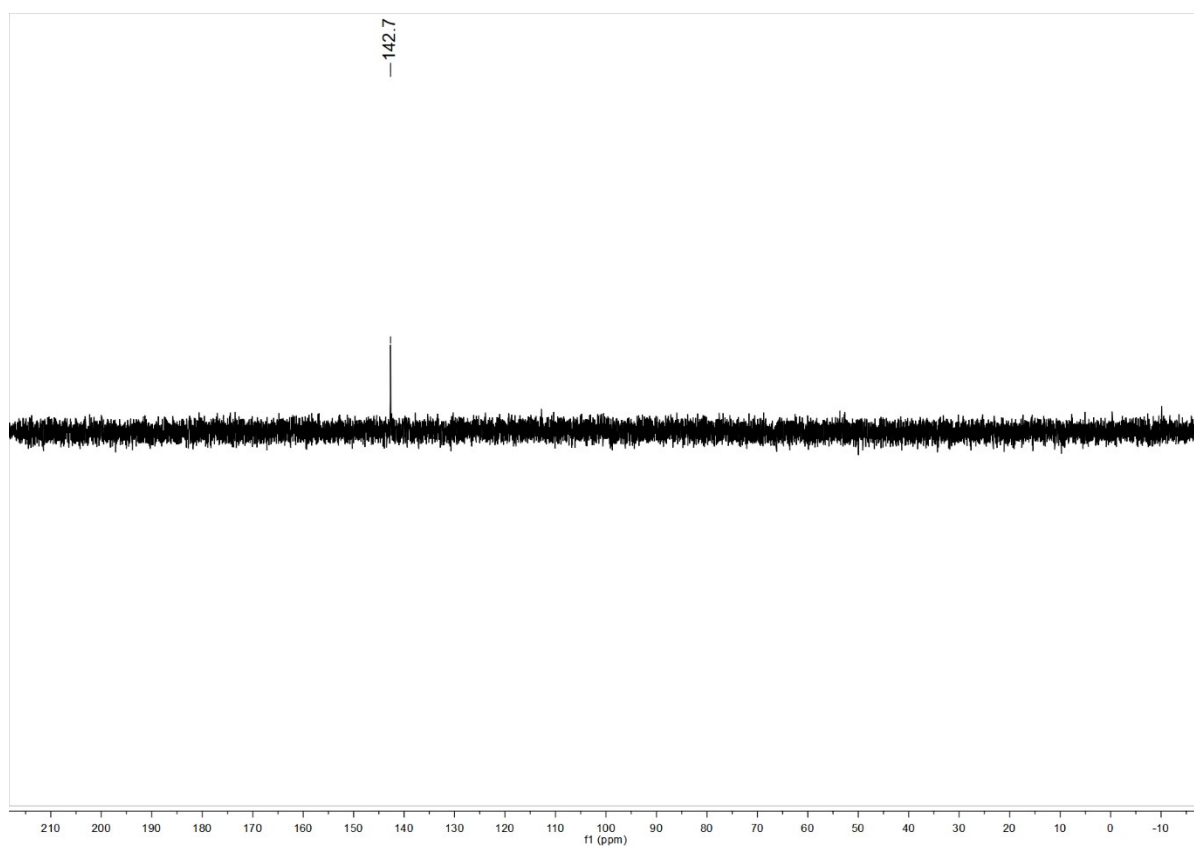

$^{13}\text{C}$  NMR of  $6 \cdot 3\text{H}_2\text{O}$  in  $\text{D}_2\text{O}$  at 25 °C

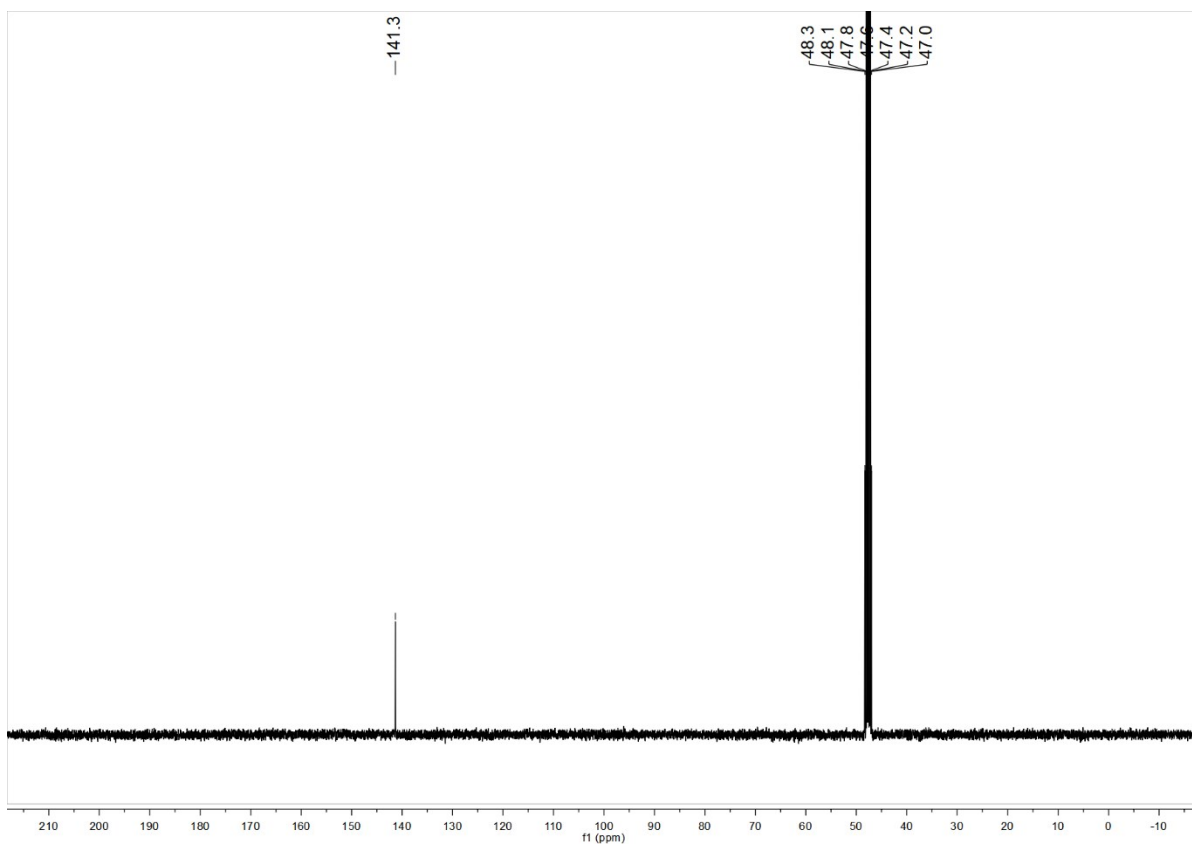

$^{13}\text{C}$  NMR of  $7 \cdot \text{H}_2\text{O}$  in Methanol- $d_4$  at 25 °C

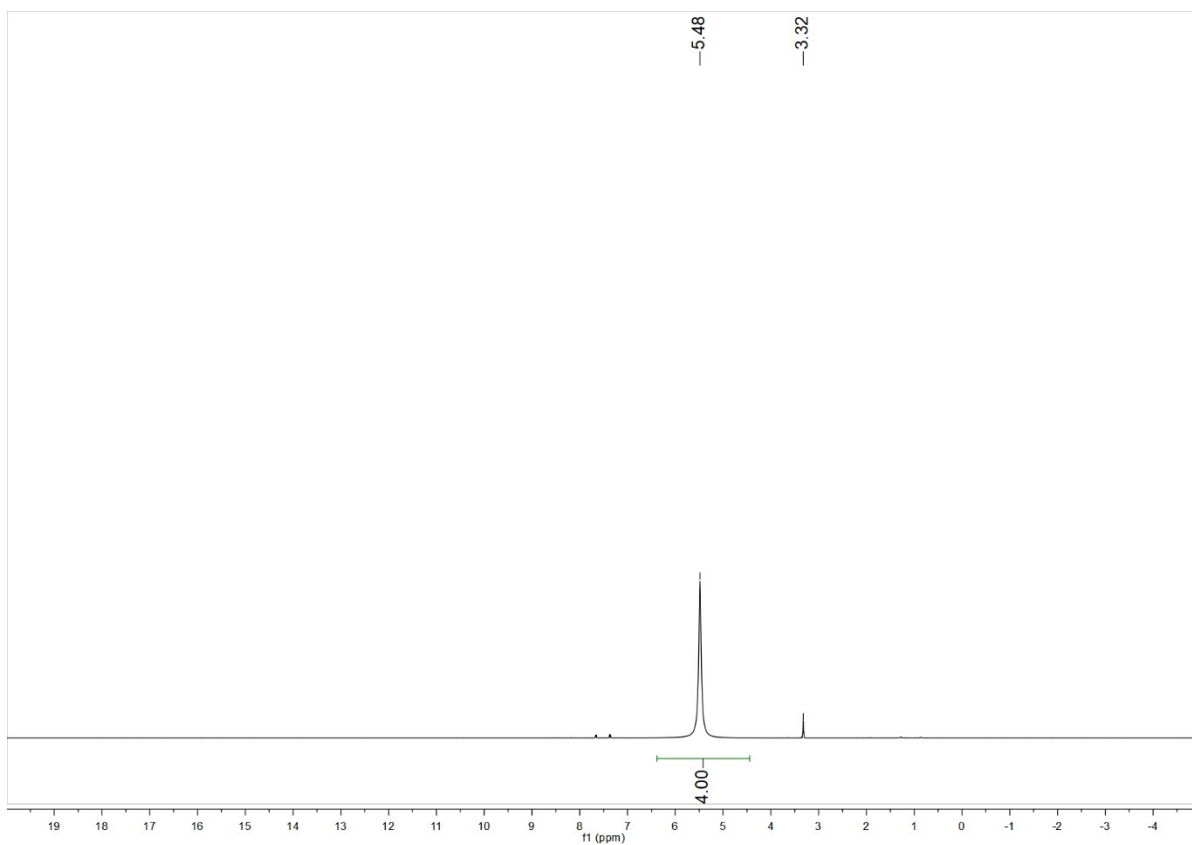

$^1\text{H}$  NMR of  $8$  in Methanol- $d_4$  at 25 °C

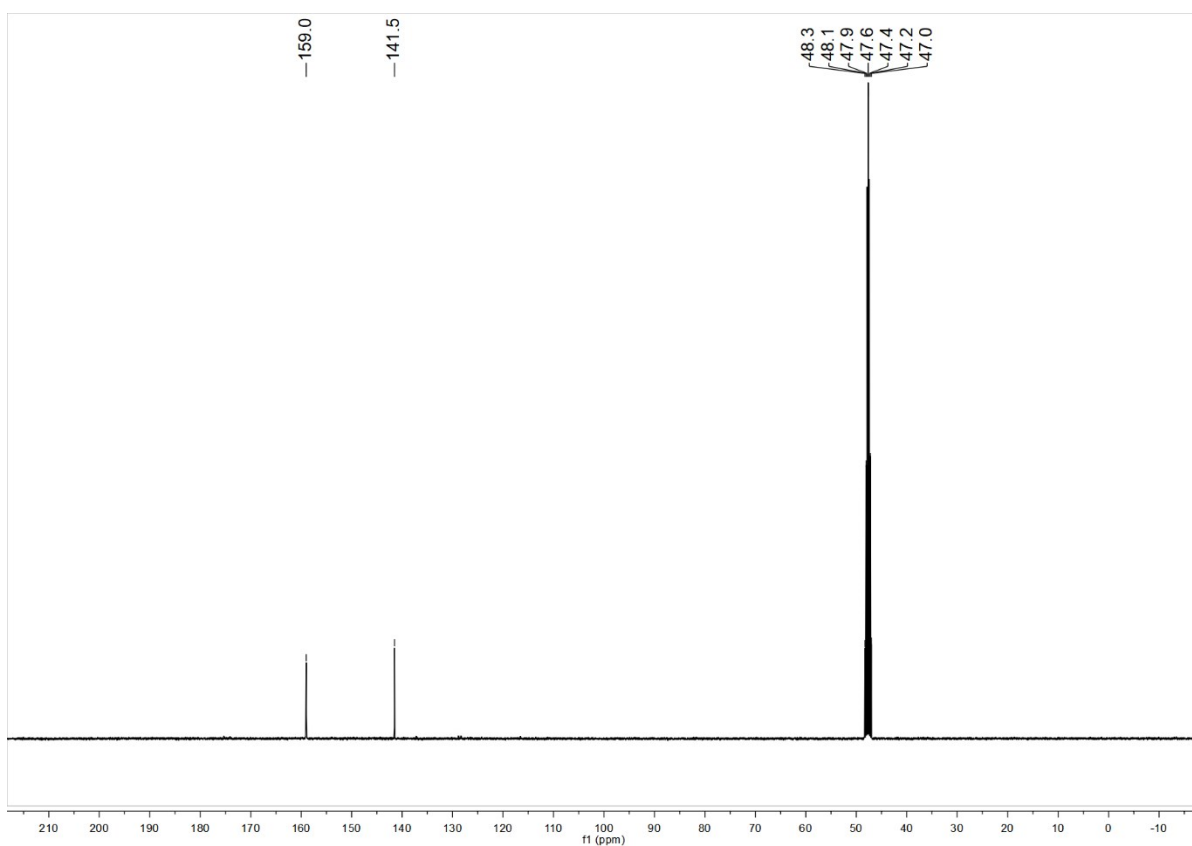

$^{13}\text{C}$  NMR of **8** in Methanol- $d_4$  at 25 °C

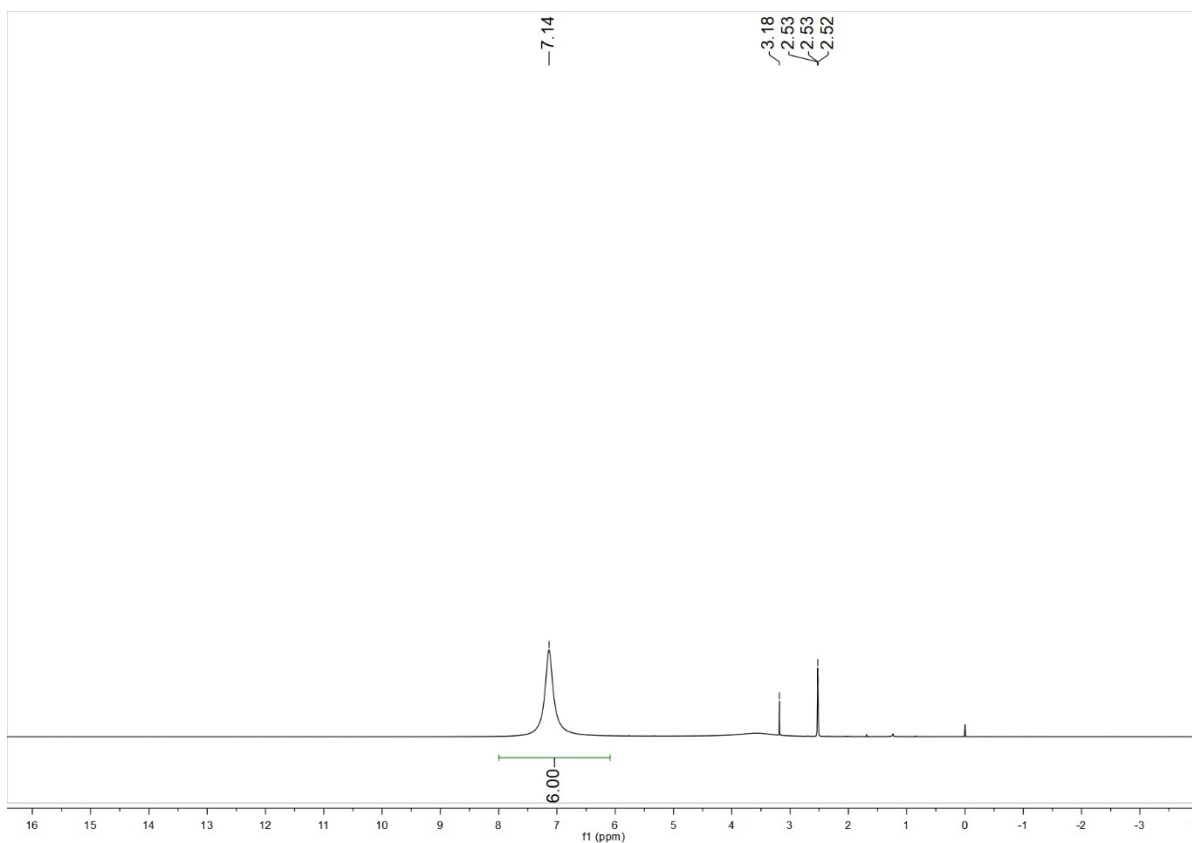

$^1\text{H}$  NMR of **9** in DMSO- $d_6$  at 25 °C

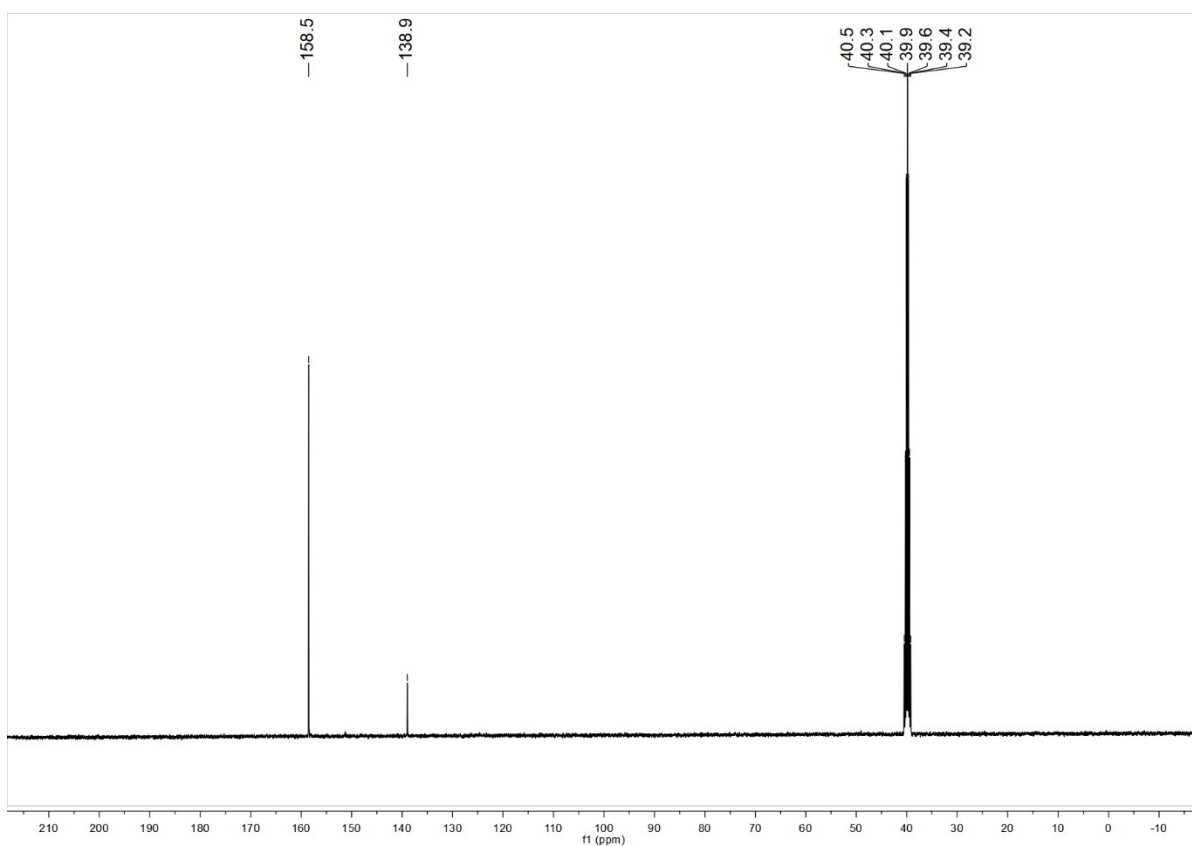

$^{13}\text{C}$  NMR of **9** in  $\text{DMSO-}d_6$  at 25 °C

### 3 DSC spectra of 5–9

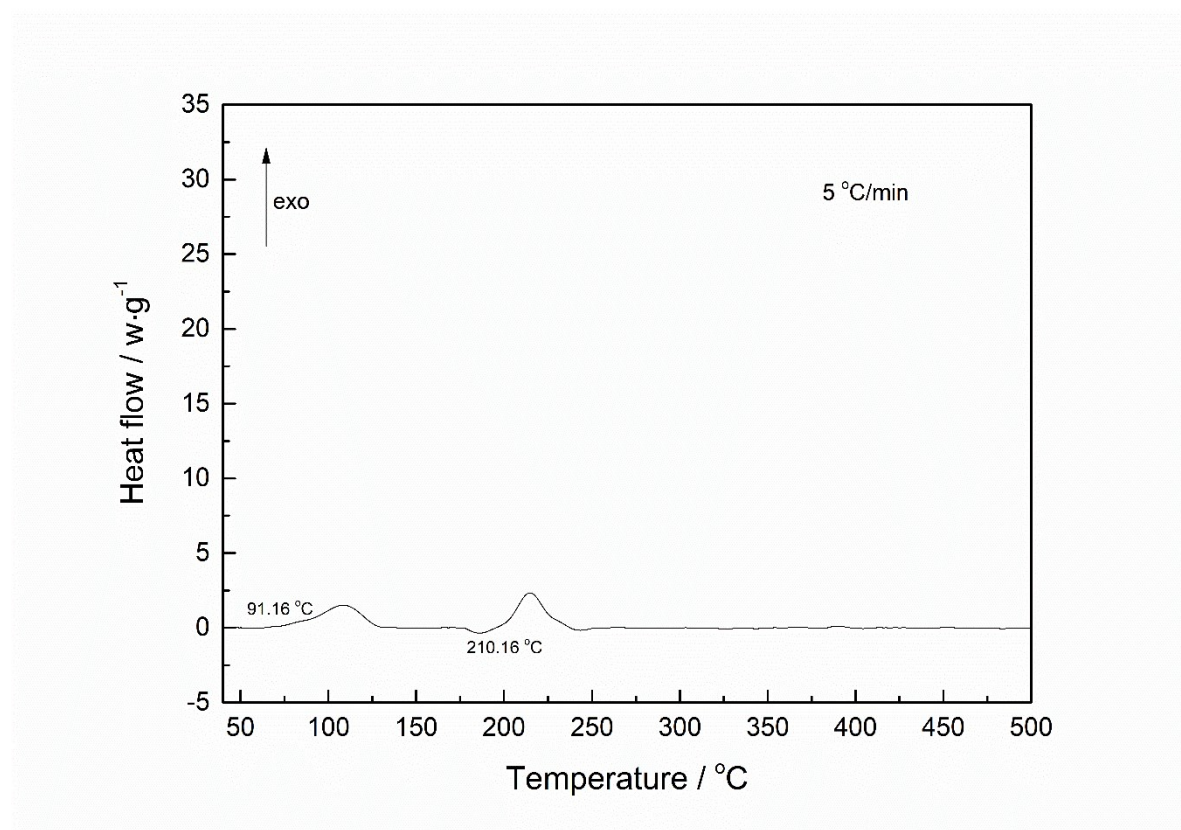

DSC plot of 5

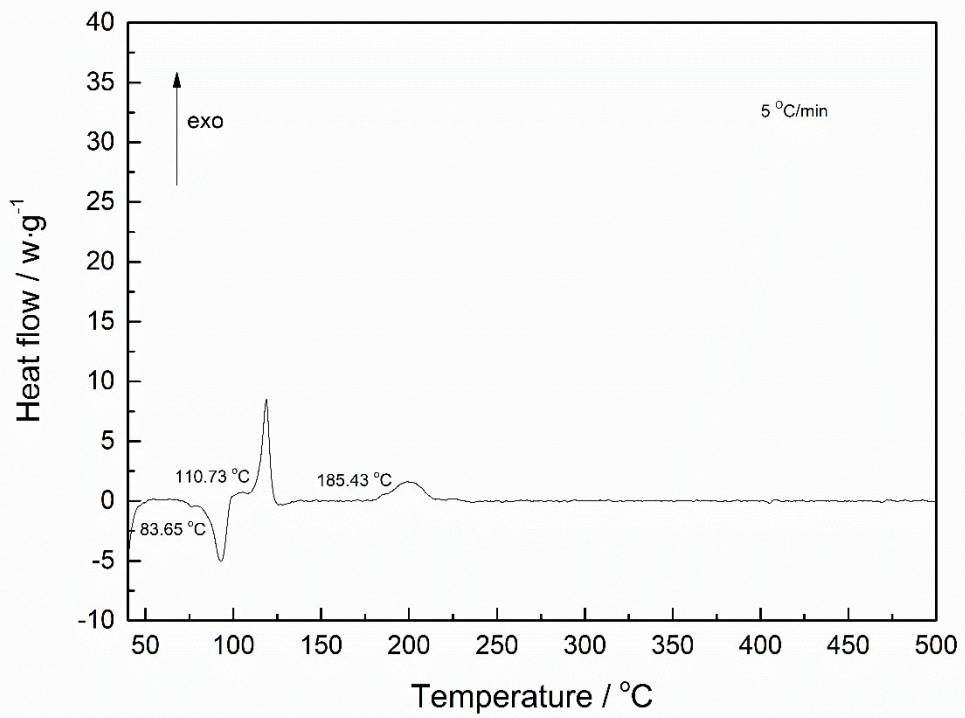

DSC plot of 6·3H<sub>2</sub>O

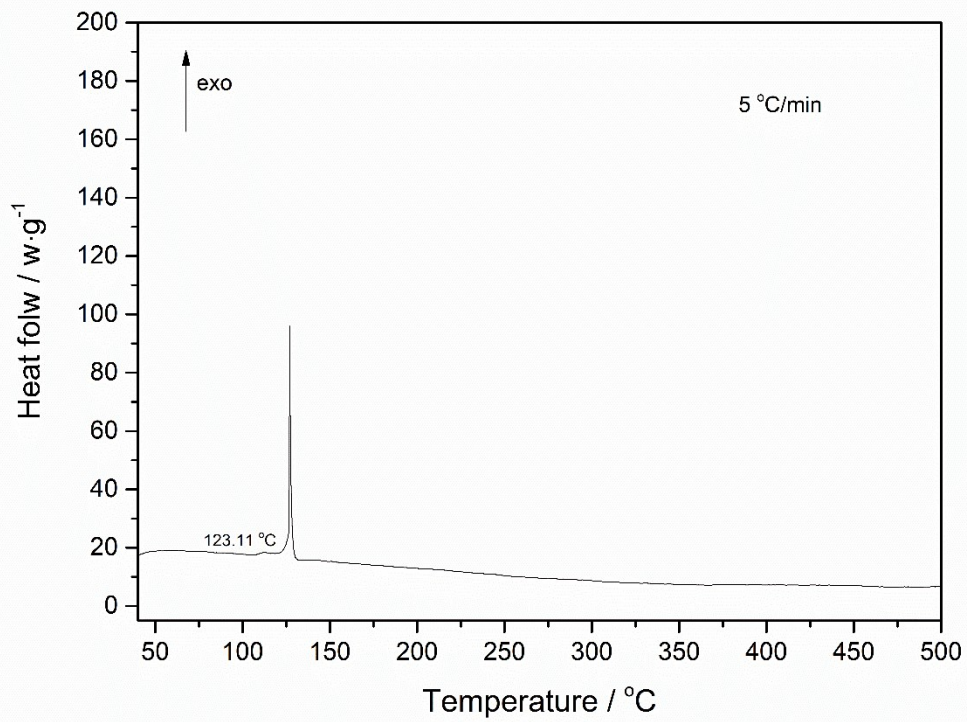

DSC plot of 7·H<sub>2</sub>O

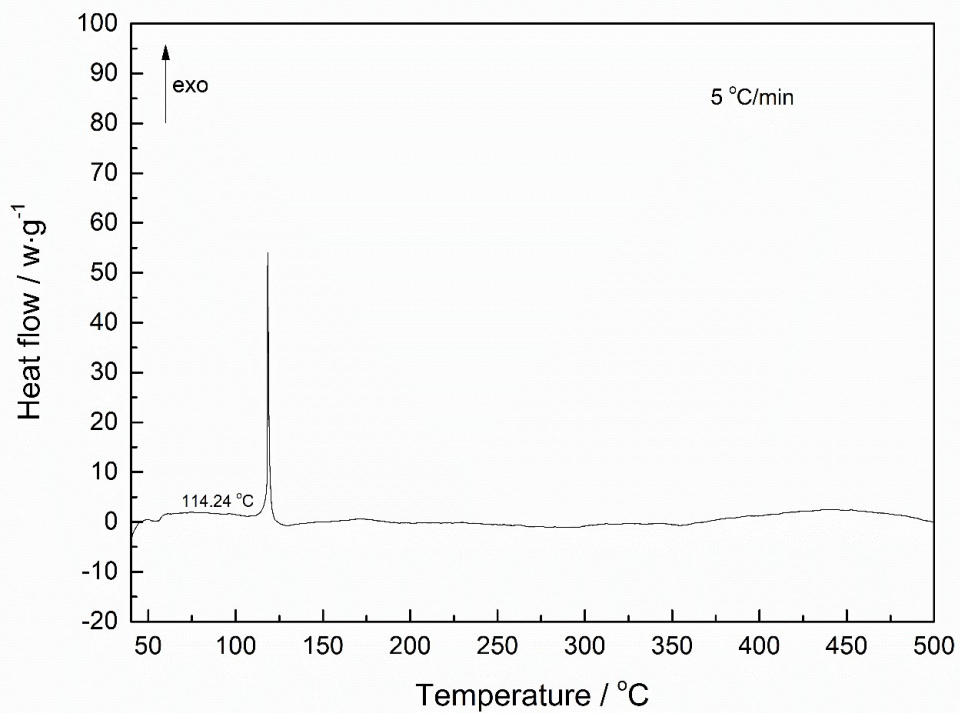

DSC plot of 8

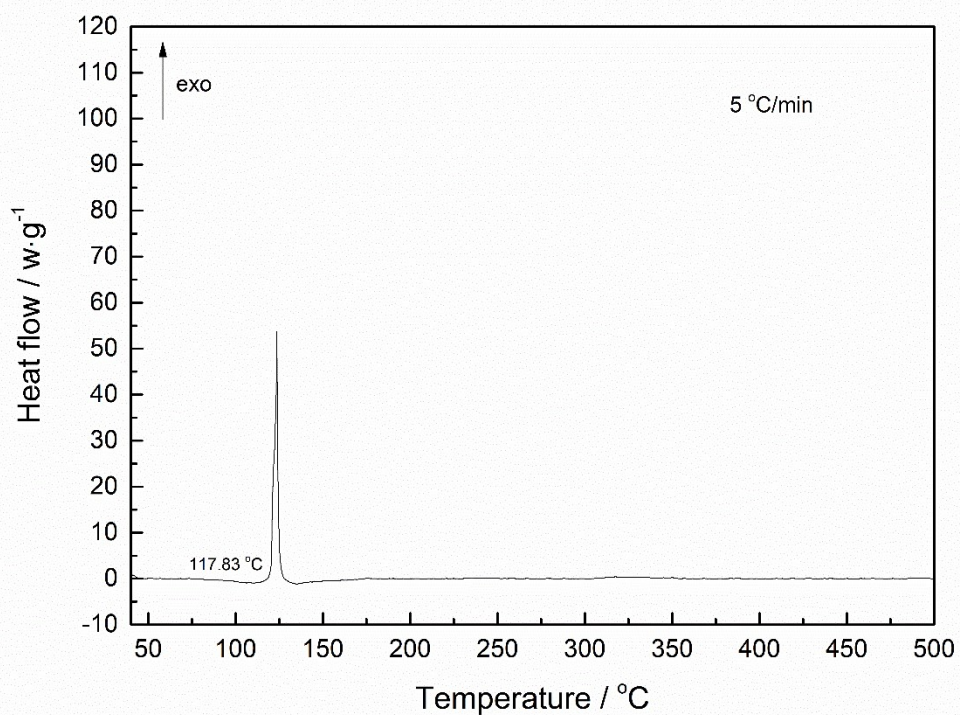

DSC plot of 9



#### 4. Calculated rate constant k for 3 to 4

| T      | k           |
|--------|-------------|
| 173.15 | 3.16388E-08 |
| 183.15 | 3.88357E-07 |
| 193.15 | 3.68977E-06 |
| 203.15 | 2.81753E-05 |
| 213.15 | 0.000177498 |
| 223.15 | 0.000953266 |
| 233.15 | 0.004424376 |
| 243.15 | 0.018137231 |
| 253.15 | 0.066637401 |
| 263.15 | 0.221634177 |
| 273.15 | 0.676154144 |
| 283.15 | 1.907240206 |
| 293.15 | 5.013881136 |
| 303.15 | 12.36959617 |
| 313.15 | 28.84095649 |
| 323.15 | 63.82197027 |
| 333.15 | 134.7954789 |
| 343.15 | 272.3210118 |
| 353.15 | 529.1634541 |
| 363.15 | 992.1665157 |
| 373.15 | 1798.595411 |

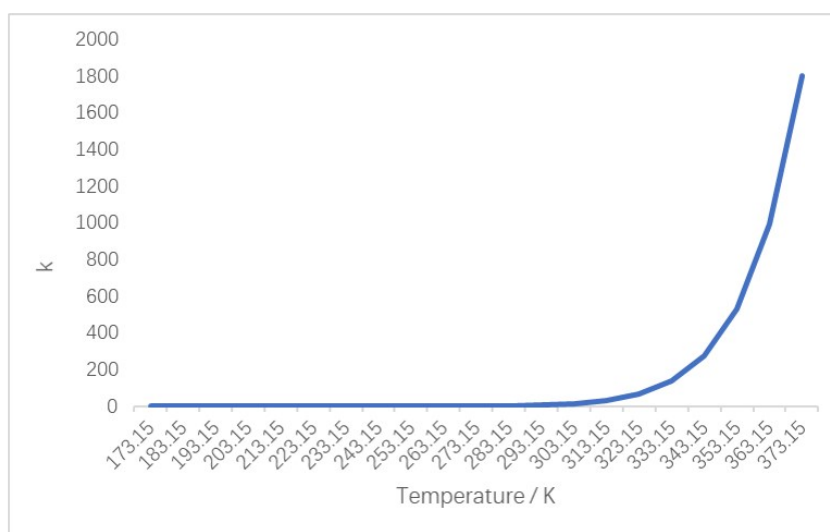

Supplement: d1qo00123j1.pdf [file d1qo00123j1.pdf]
